# Supplementary material for: Hepatocellular Carcinoma Screening in a Contemporary Cohort of At-Risk Patients
Source: PubMed Central journal article supplement (PMC11059036; doi:10.1001/jamanetworkopen.2024.8755), 2024-04-29
Supplement: jamanetwopen-e248755-s002.pdf [file jamanetwopen-e248755-s002.pdf]

## Data Sharing Statement

Daher. Hepatocellular Carcinoma Screening in a Contemporary Cohort of At-Risk Patients. *JAMA Netw Open*. Published April 30, 2024. doi:10.1001/jamanetworkopen.2024.8755

### Data

**Data available:** Yes

**Data types:** Deidentified participant data, Data dictionary

**How to access data:** The data supporting the findings of this study are available in the article. Data are also available from the corresponding author [AGS] upon reasonable request.

**When available:** With publication

### Supporting Documents

**Document types:** None

### Additional Information

**Who can access the data:** Data will be available from the corresponding author [AGS] upon reasonable request.

**Types of analyses:** For any purpose

**Mechanisms of data availability:** With investigator support, after approval of a proposal and with a signed data access agreement

**Any additional restrictions:** Requiring a signed data use agreement
